# Supplementary material
Source: PubMed Central journal article supplement (PMC6644121)
Supplement: ao6b00220_si_001.pdf [file ao6b00220_si_001.pdf]

# Supplemental Material For

## Method Development and Validation for Quantitation of FruArg in Mice Plasma and Brain Tissue Using UPLC-MS/MS

Mitch C. Johnson<sup>1,2</sup>, Hailong Song<sup>2,3,4</sup>, Jiankun Cui<sup>2,3,4</sup>, Valeri V. Mossine<sup>2,5</sup>, Zezong Gu<sup>2,3,4,\*</sup>, and C. Michael Greenlief<sup>1,2,\*</sup>

<sup>1</sup>Department of Chemistry, University of Missouri, Columbia, Missouri, 65211, United States

<sup>2</sup>Center for Botanical Interaction Studies, University of Missouri, Columbia, Missouri, 65211, United States

<sup>3</sup>Center for Translational Neuroscience, University of Missouri School of Medicine, Columbia, Missouri, 65212, United States

<sup>4</sup>Department of Pathology & Anatomical Sciences, University of Missouri School of Medicine, Columbia, Missouri 65212, United States

<sup>5</sup>Department of Biochemistry, University of Missouri, Columbia, Missouri, 65211, United States

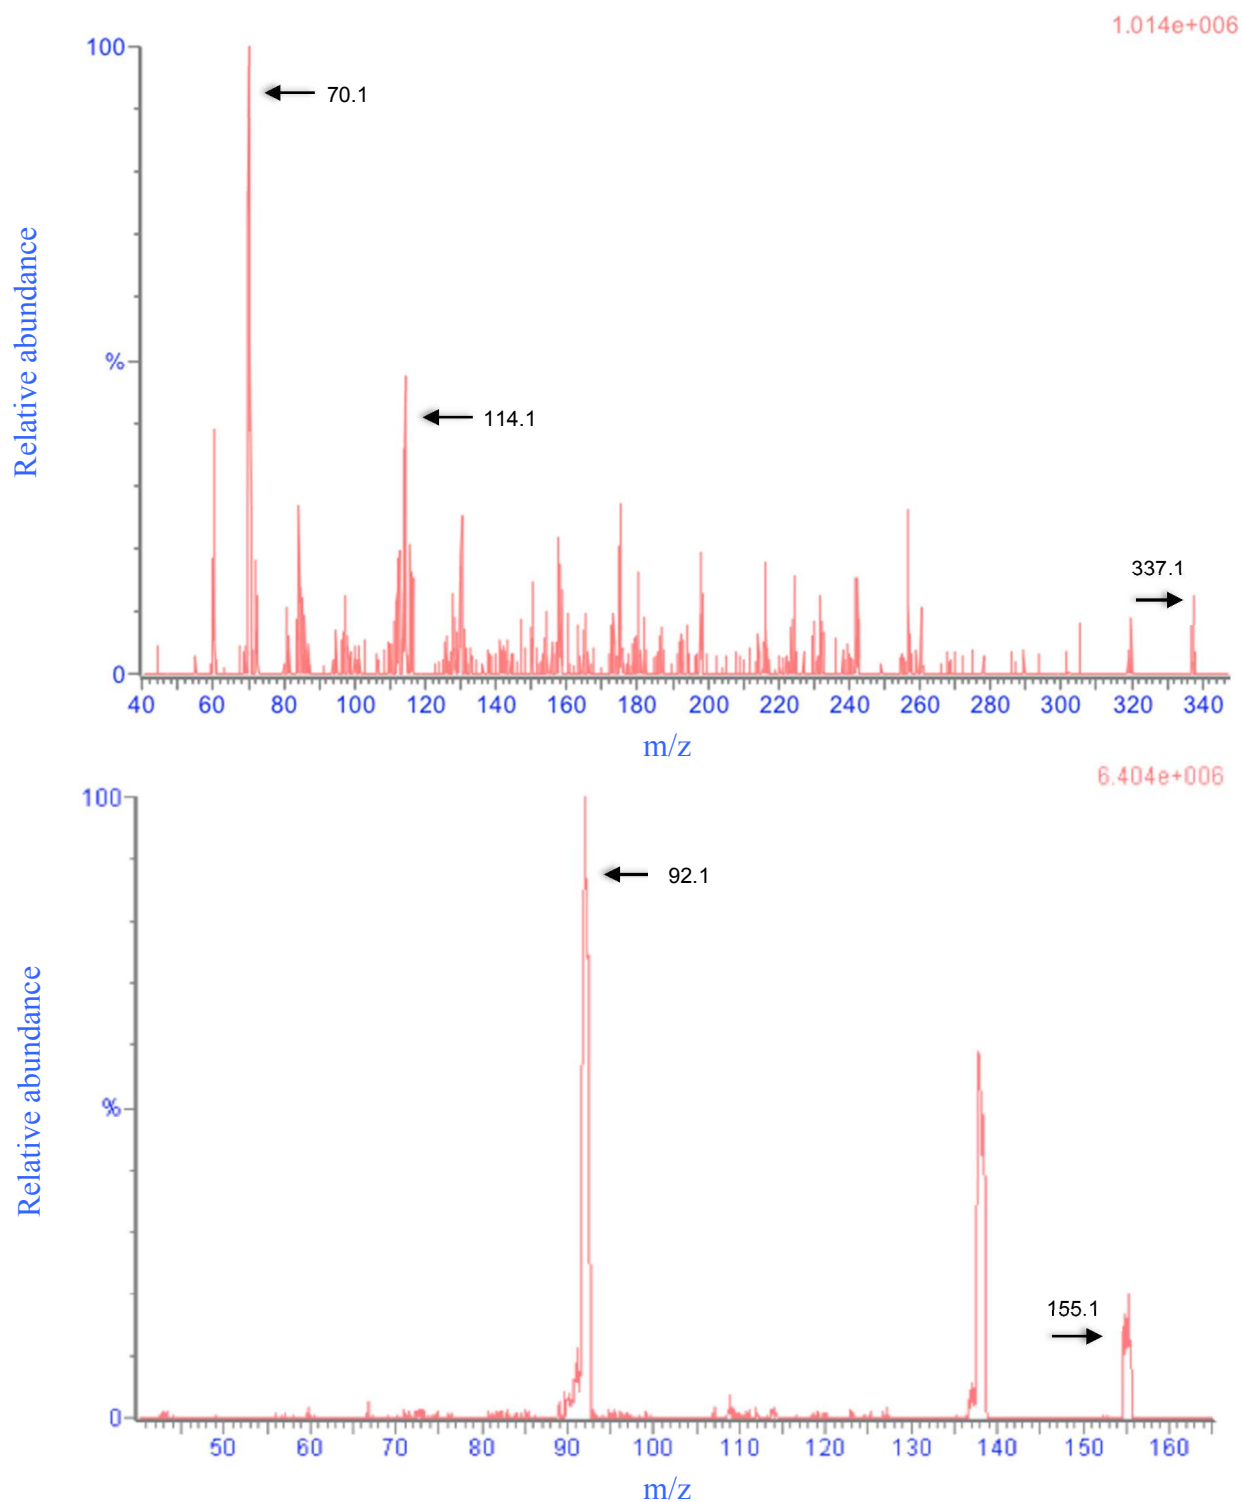

**Figure S1.** Product ion mass spectrum (MS/MS) for FruArg (top) and L-Lysine-d<sub>8</sub> (bottom). Parent m/z of FruArg is 337.3 Da and L-Lysine-d<sub>8</sub> is 155.1 Da. MRM transitions of FruArg were identified at m/z = 337.1 → 70.1 and 114.1 Da; as well as m/z = 155.1 → 92.1 Da for L-Lysine-d<sub>8</sub>. The most abundant daughter ions were used for quantification.

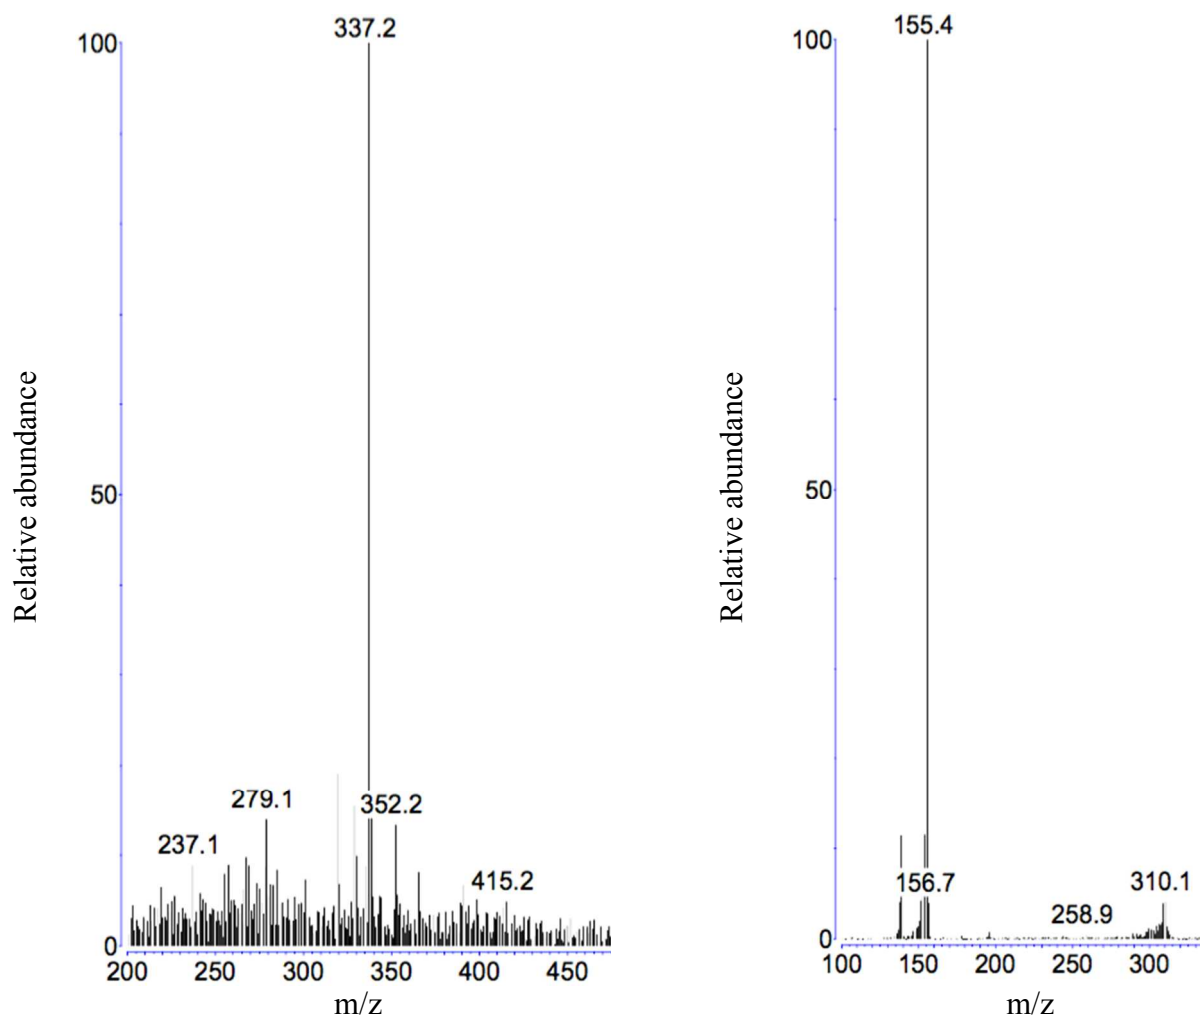

**Figure S2.** Direct infusion mass spectrum of FruArg (left) and L-Lysine-d<sub>8</sub> (right) using ESI positive mode.

| <b>Table S1.</b> Average [FruArg] (n=3) at 15 min after intraperitoneal injection |                                  |
|-----------------------------------------------------------------------------------|----------------------------------|
|                                                                                   | [FruArg] pmol/mg tissue $\pm$ SE |
| cerebellum                                                                        | 6 $\pm$ 2                        |
| cortex                                                                            | 4 $\pm$ 2                        |
| hippocampus                                                                       | 4 $\pm$ 2                        |
| striatum                                                                          | 7 $\pm$ 3                        |

SE: Standard error

| <b>Table S2.</b> Average values (n=4) for AUC FruArg/L-Lysine d <sub>8</sub> spiked before SPE, after SPE and external FruArg standards. |                                                                   |                                                                   |
|------------------------------------------------------------------------------------------------------------------------------------------|-------------------------------------------------------------------|-------------------------------------------------------------------|
|                                                                                                                                          | <b>Plasma</b>                                                     | <b>Brain Tissue</b>                                               |
|                                                                                                                                          | $\frac{\text{AUC FruArg}}{\text{AUC L-Lysine d}_8} \pm \text{SE}$ | $\frac{\text{AUC FruArg}}{\text{AUC L-Lysine d}_8} \pm \text{SE}$ |
| FruArg spike before SPE                                                                                                                  | 2.43 $\pm$ 0.01                                                   | 2.89 $\pm$ 0.04                                                   |
| FruArg spike after SPE                                                                                                                   | 2.44 $\pm$ 0.02                                                   | 4.6 $\pm$ 0.2                                                     |
| FruArg external standard                                                                                                                 | 2.447 $\pm$ 0.001                                                 | 4.41 $\pm$ 0.02                                                   |

SE: Standard error
